# Supplementary material for: Sedimentary Cobalt Protoporphyrin as a Potential Precursor of Prosthetic Heme Group for Bacteria Inhabiting Fossil Organic Matter-Rich Shale Rock
Source: MDPI journal article supplement (doi:10.3390/biom11121913), 2021-12-20
Supplement: s1 [file s1]

**Supplementary information D. Supplementary results of the chemical analyses of the CoPPIX-BC and CoPPIX-SC samples**

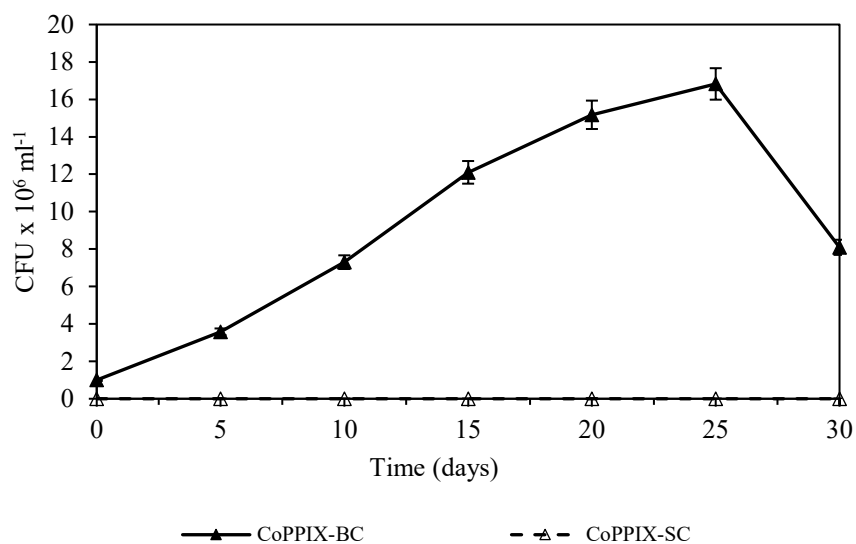

Figure S23. Growth curve of LM27 strain cultured on mineral medium with CoPPIX (CoPPIX-BC)

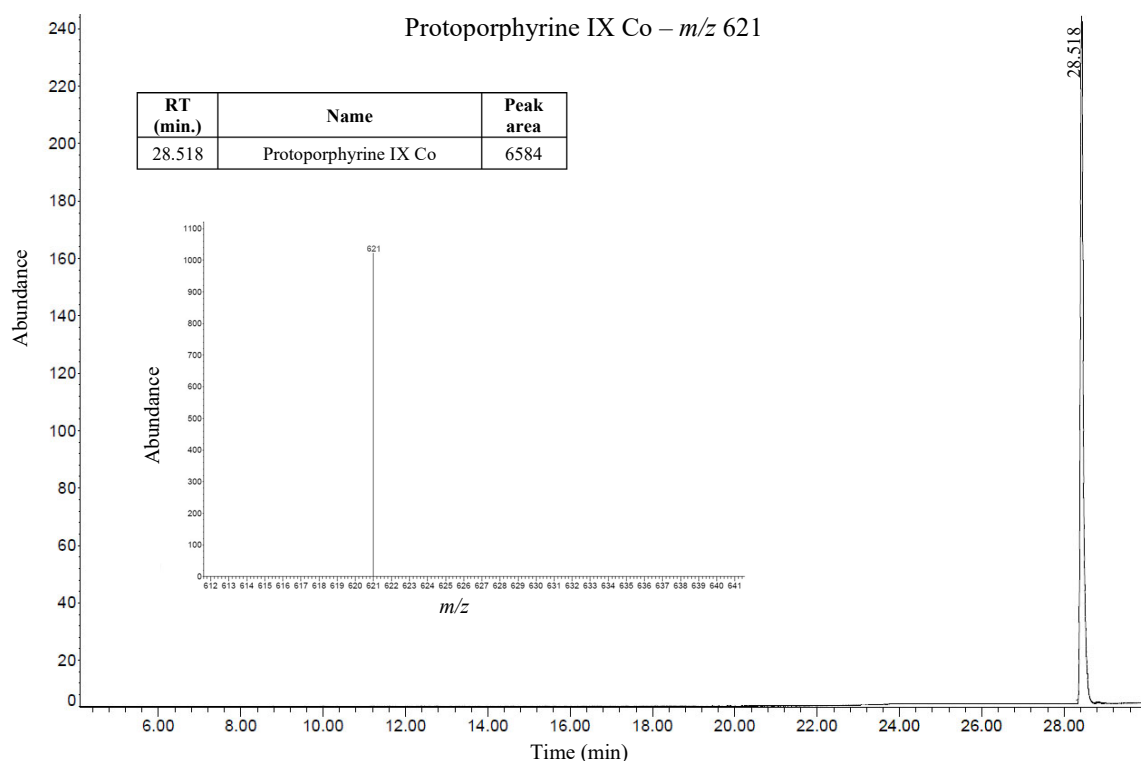

Figure S24. SIM chromatogram and mass spectrum (inset) of chloroform extract of the supernatant of CoPPIX-BC. SIM chromatogram of CoPPIX is presented in Figure S1 (Supplementary information A).

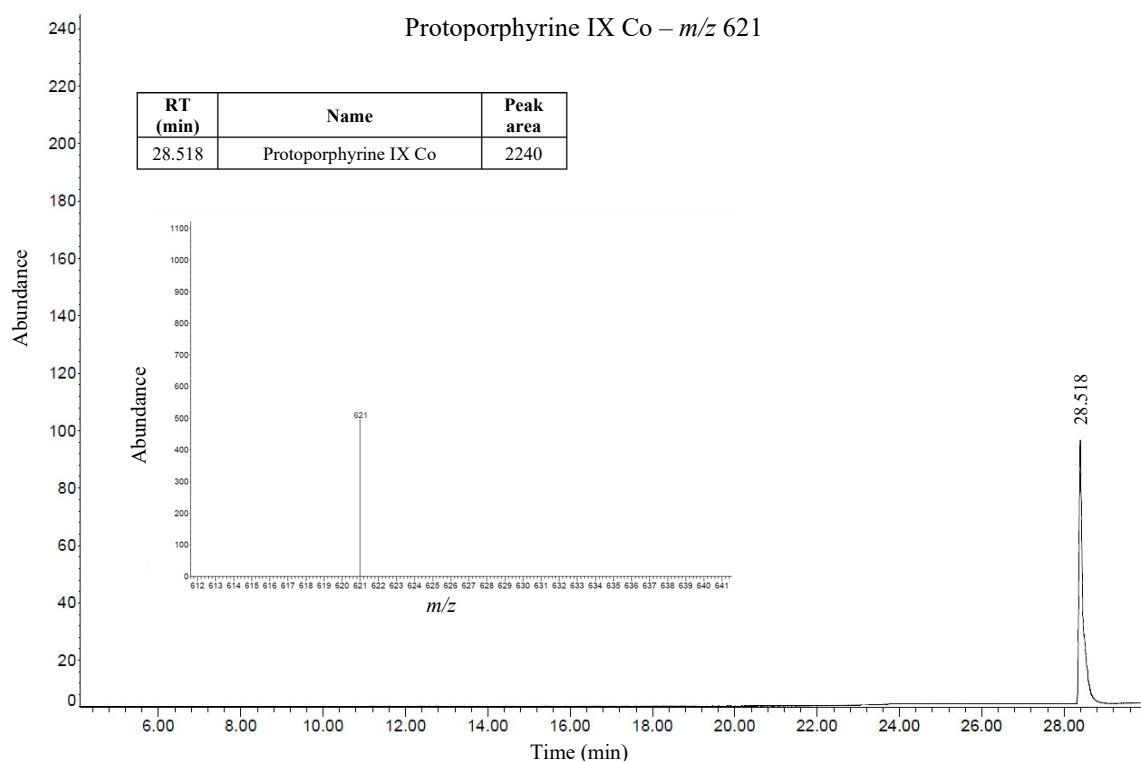

Figure S25. SIM chromatogram and mass spectrum (inset) of dichloromethane:methanol extract of the sediment of CoPPIX-BC. SIM chromatogram of CoPPIX is presented in Figure S1 (Supplementary information A).

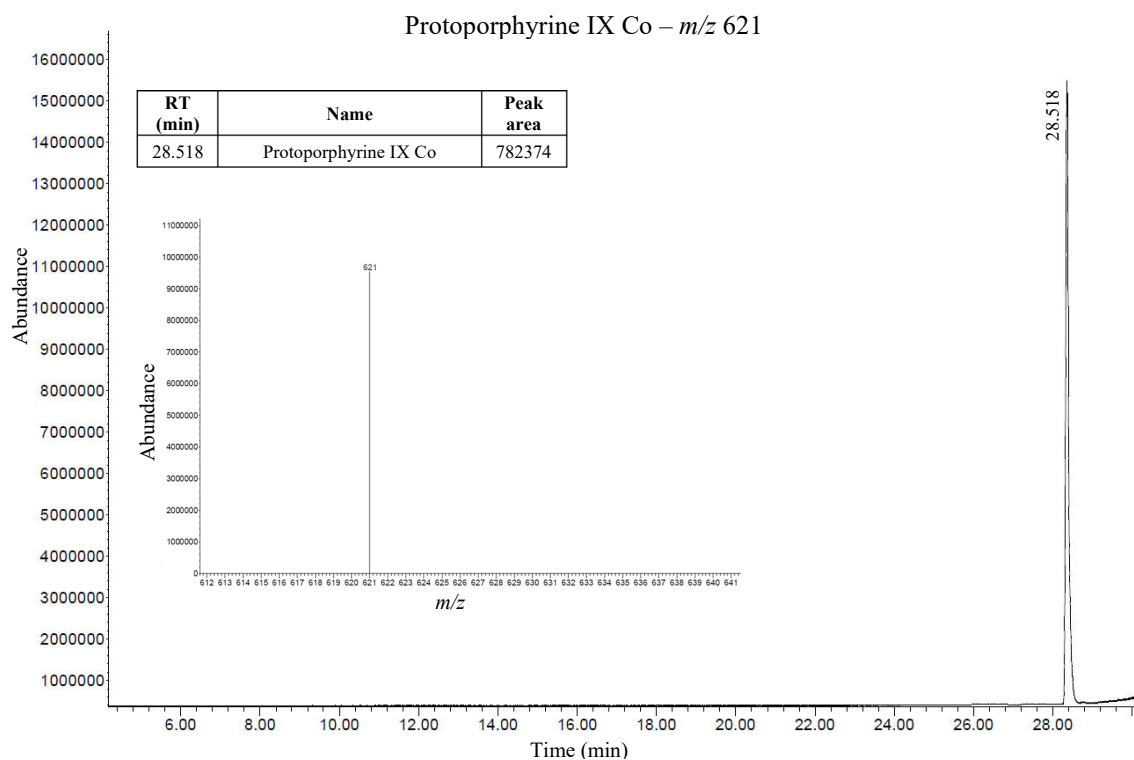

Figure S26. SIM chromatogram and mass spectrum (inset) of chloroform extract of the supernatant of CoPPIX-SC. SIM chromatogram of CoPPIX is presented in Figure S1 (Supplementary information A).

Table S3. Concentrations of CoPPIX in CoPPIX-BC and CoPPIX-SC based on GC-MS analyzes of  $m/z$  621

| Sample                | Sample |        |        | SD      | Average | Unit                    |
|-----------------------|--------|--------|--------|---------|---------|-------------------------|
|                       | 1      | 2      | 3      |         |         |                         |
| PPIXCo-BC supernatant | 2.175  | 2.173  | 2.176  | 1.6E-03 | 2.175   | $\mu$ M                 |
| PPIXCo-BC sediment    | 0.090  | 0.090  | 0.090  | 2.4E-05 | 0.090   | $\mu$ mol/g wet biomass |
| PPIXCo-SC supernatant | 50.063 | 50.036 | 50.120 | 4.3E-02 | 50.073  | $\mu$ M                 |
| PPIXCo-BC sediment    | 0      | 0      | 0      | 0       | 0       | -                       |

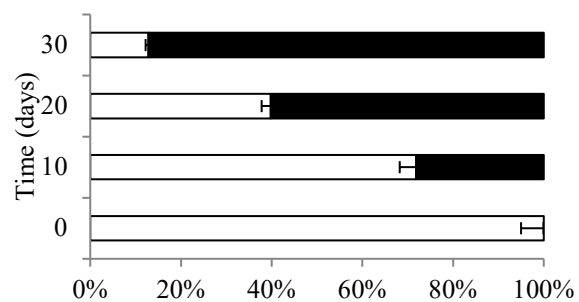

Figure S27. Accumulation of CoPPIX by LM27 strain: percentage content of cobalt in supernatant and cells of CoPPIX-BC after 10, 20 and 30 days of cultivation

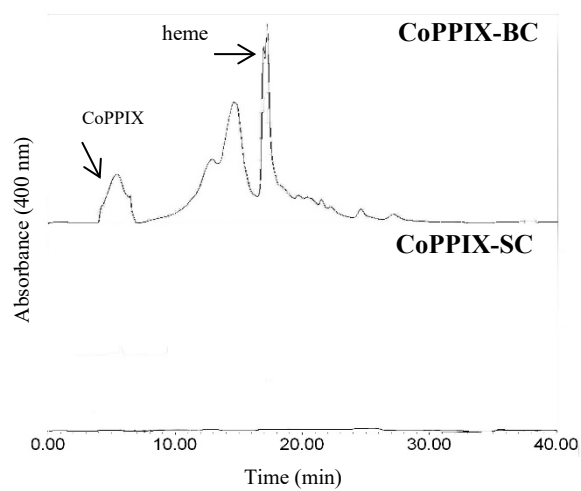

Figure S28. Detection of heme in the sediments of CoPPIX-BC and CoPPIX-SC—HPLC-PAD chromatograms at 400 nm. HPLC-PAD chromatogram of heme is presented in Figure S13A (Supplementary information A).

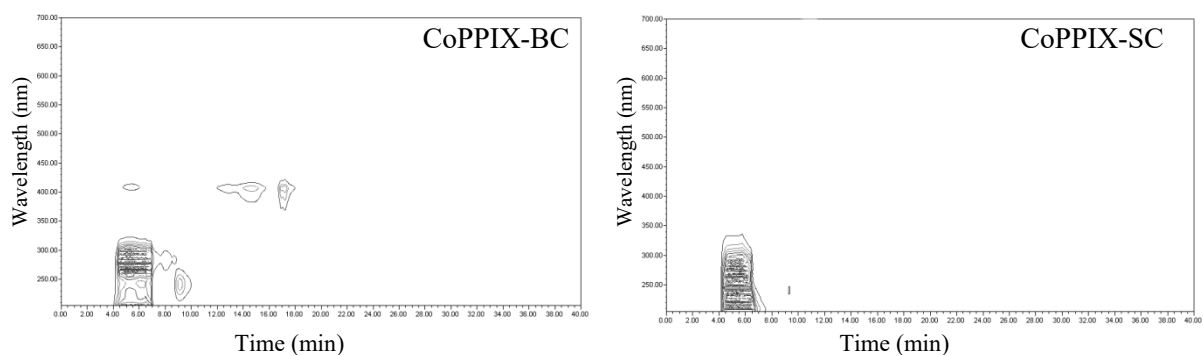

Figure S29. High-performance liquid 3D chromatograms of organic extracts of sediments obtained using HPLC-PAD

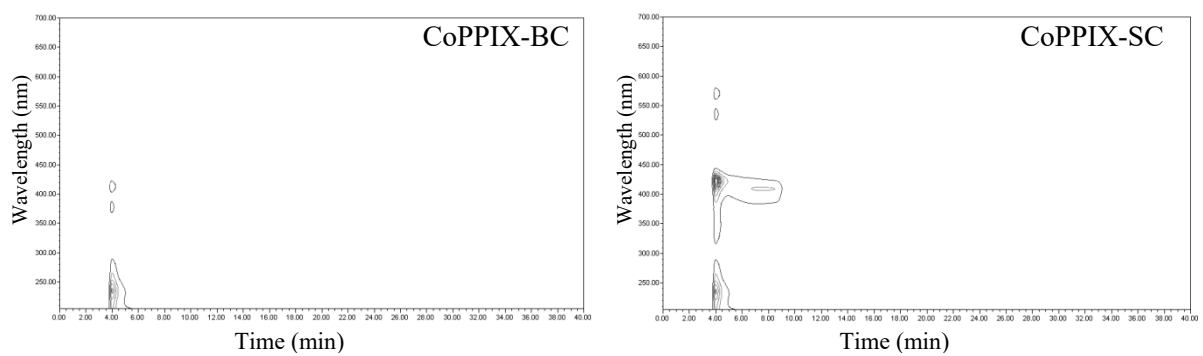

Figure S30. High-performance liquid 3D chromatograms of organic extracts of supernatants obtained using HPLC-PAD

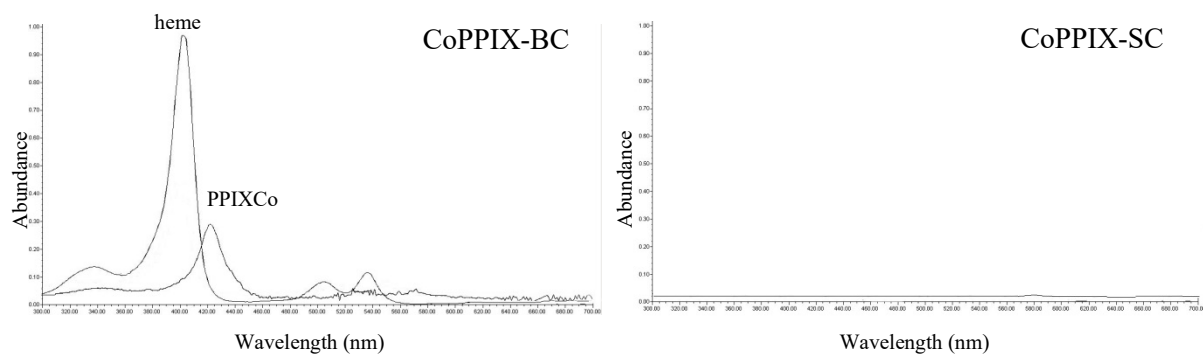

Figure S31. UV-Vis spectra of organic extracts of sediments obtained using HPLC-PAD



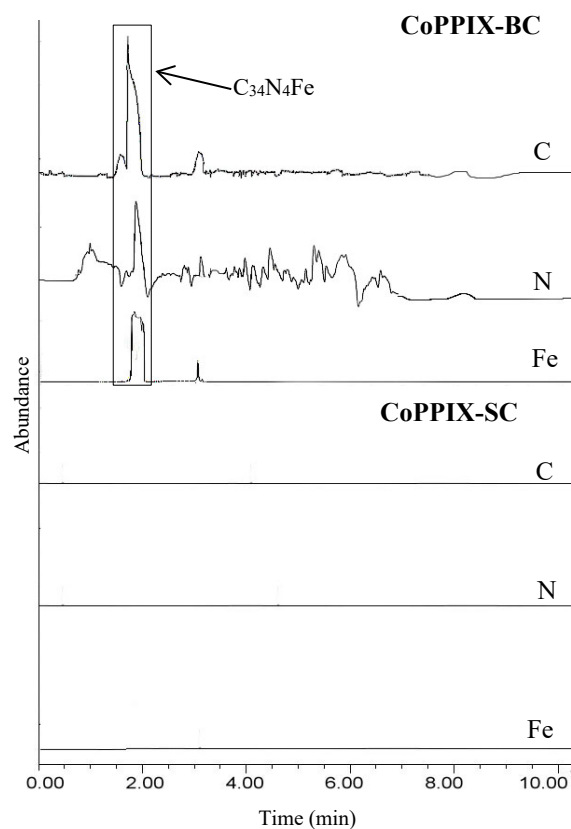

Figure S32. Detection of heme (carbon, nitrogen, and iron) in CoPPIX-BC and CoPPIX-SC—GC-AED chromatograms. AED chromatogram of heme is presented in Figure S5 (Supplementary information A).
