# Supplementary material for: Sedimentary Cobalt Protoporphyrin as a Potential Precursor of Prosthetic Heme Group for Bacteria Inhabiting Fossil Organic Matter-Rich Shale Rock
Source: MDPI journal article supplement (doi:10.3390/biom11121913), 2021-12-20
Supplement: s1 [file s1]

**Supplementary information C. Supplementary results of the chemical analyses of the SR-BC and SR-SC samples**

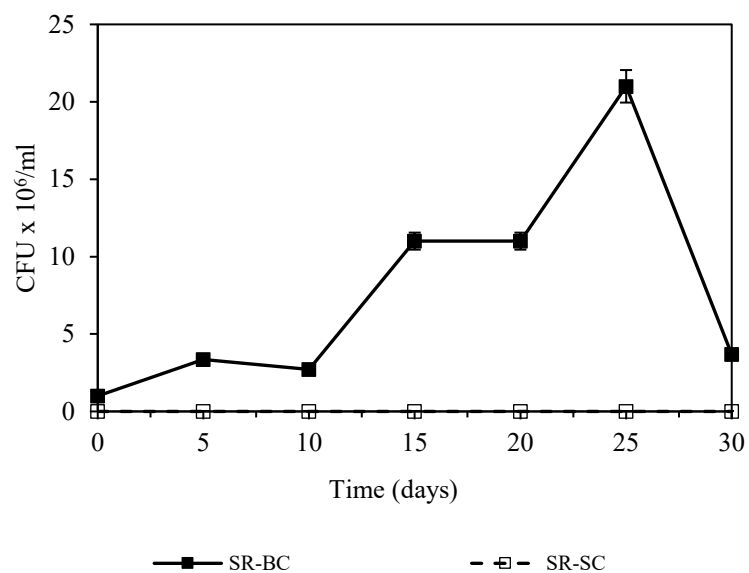

Figure S13. Growth curve of LM27 strain cultured on mineral medium with SR (SR-BC)

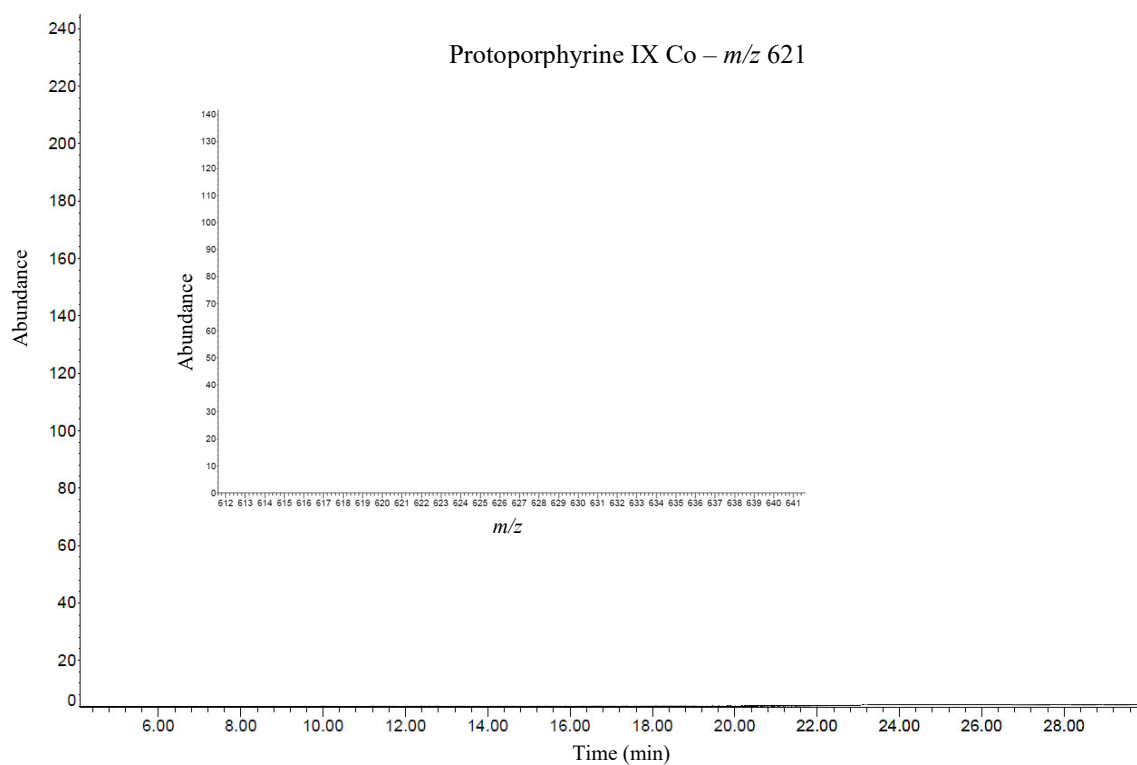

Figure S14. SIM chromatogram and mass spectrum (inset) of chloroform extract of the supernatant of SR-BC. SIM chromatogram of CoPPIX is presented in Figure S1 (Supplementary information A).

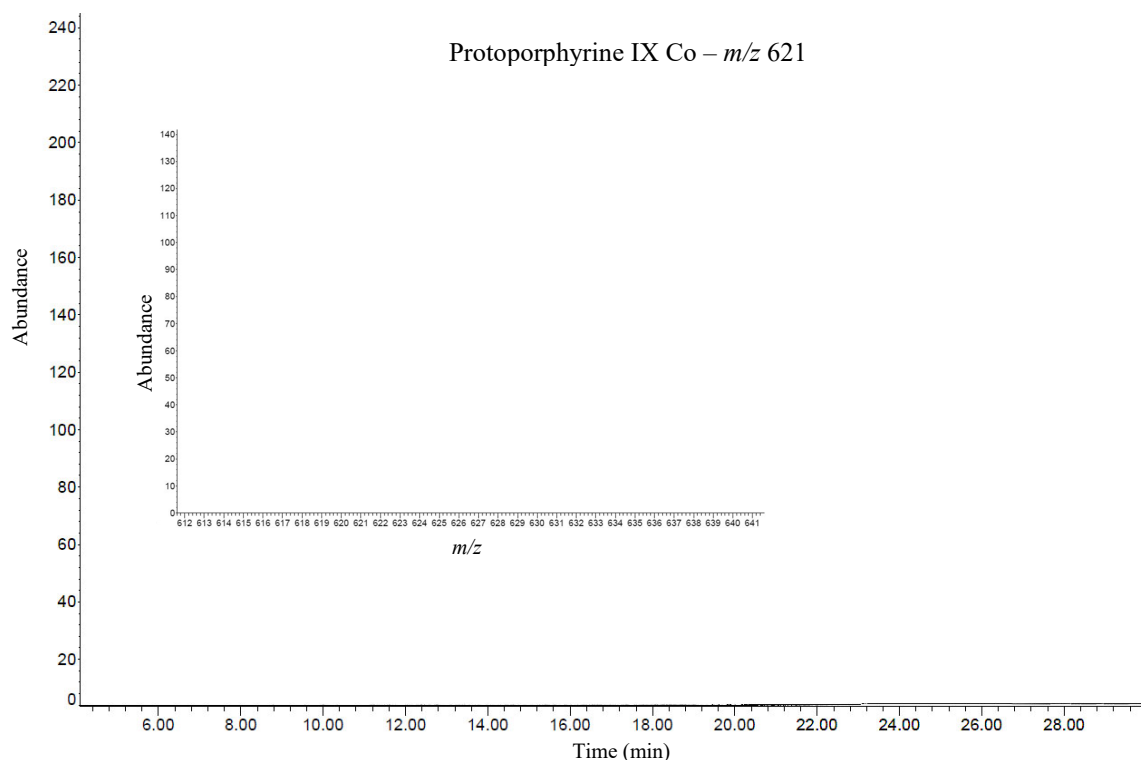

Figure S15. SIM chromatogram and mass spectrum (inset) of dichloromethane:methanol extract of the sediment of SR-BC. SIM chromatogram of CoPPIX is presented in Figure S1 (Supplementary information A)

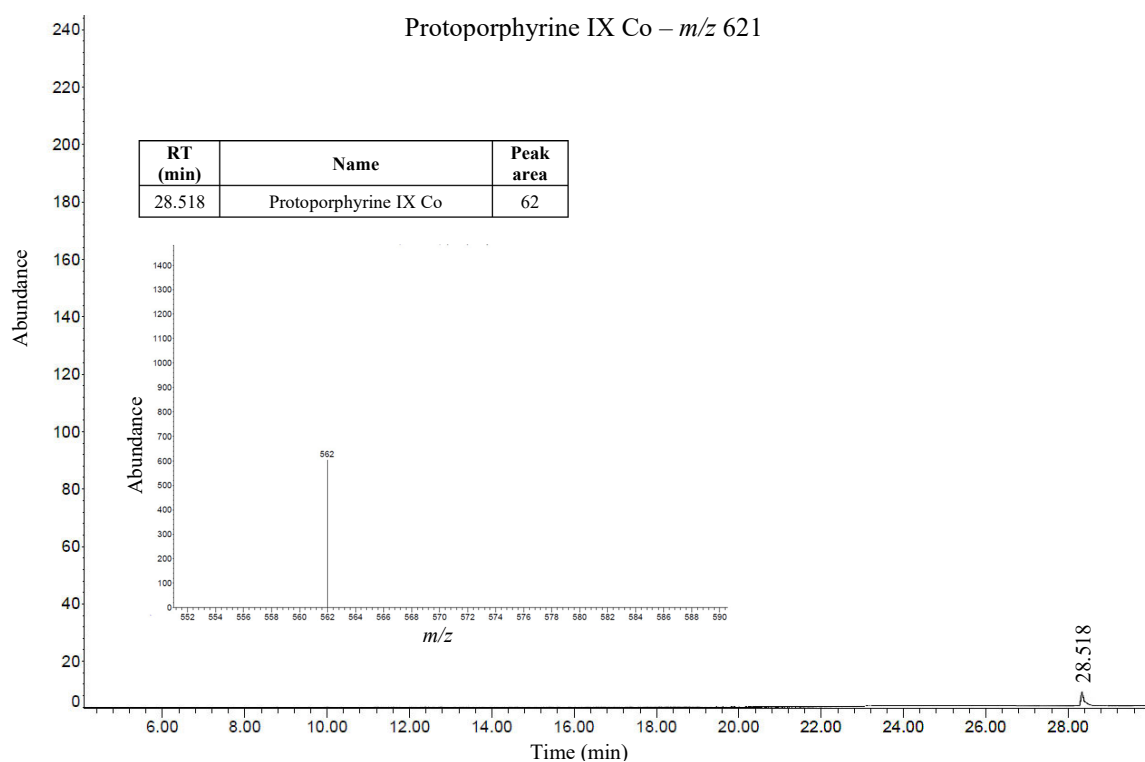

Figure S16. SIM chromatogram and mass spectrum (inset) of chloroform extract of the supernatant of SR-SC. SIM chromatogram of CoPPIX is presented in Figure S1 (Supplementary information A)

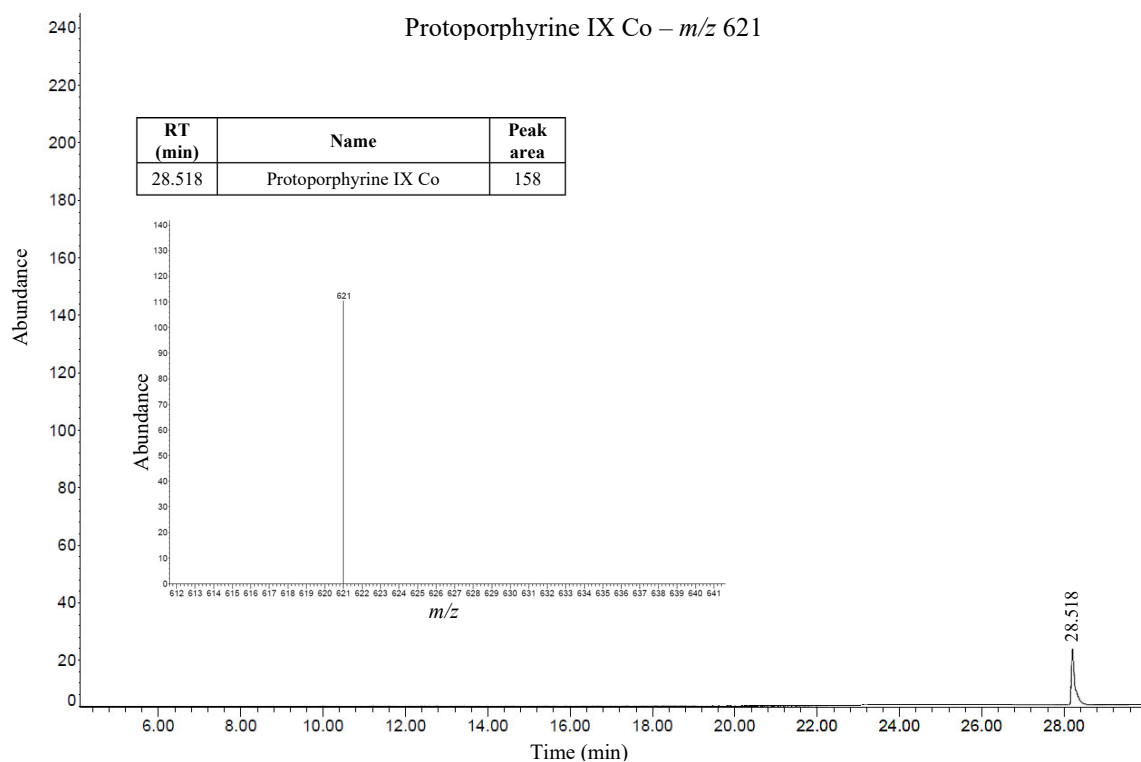

Figure S17. SIM chromatogram and mass spectrum (inset) of dichloromethane:methanol extract of the sediment of SR-SC. SIM chromatogram of CoPPIX is presented in S1 (Supplementary information A)

Table S2. Concentrations of CoPPIX in SR-BC and SR-SC based on GC-MS analyzes of  $m/z$

621

| Sample            | Sample |       |       | SD       | Average | Unit               |
|-------------------|--------|-------|-------|----------|---------|--------------------|
|                   | 1      | 2     | 3     |          |         |                    |
| SR-BC supernatant | 0      | 0     | 0     | 0        | 0       | $\mu\text{M}$      |
| SR-BC sediment    | 0      | 0     | 0     | 0        | 0       | $\mu\text{mol/kg}$ |
| SR-SC supernatant | 0.020  | 0.020 | 0.020 | 1,53E-04 | 0.020   | $\mu\text{M}$      |
| SR-SC sediment    | 0.521  | 0.523 | 0.516 | 3,87E-03 | 0.520   | $\mu\text{mol/kg}$ |

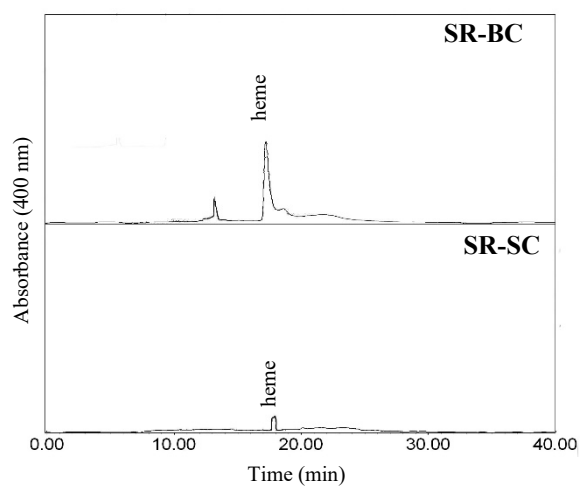

Figure S18. Detection of heme in SR-BC and SR-SC—HPLC-PAD chromatograms at 400 nm. HPLC-PAD chromatogram of heme is presented in Figure S3A (Supplementary information A)

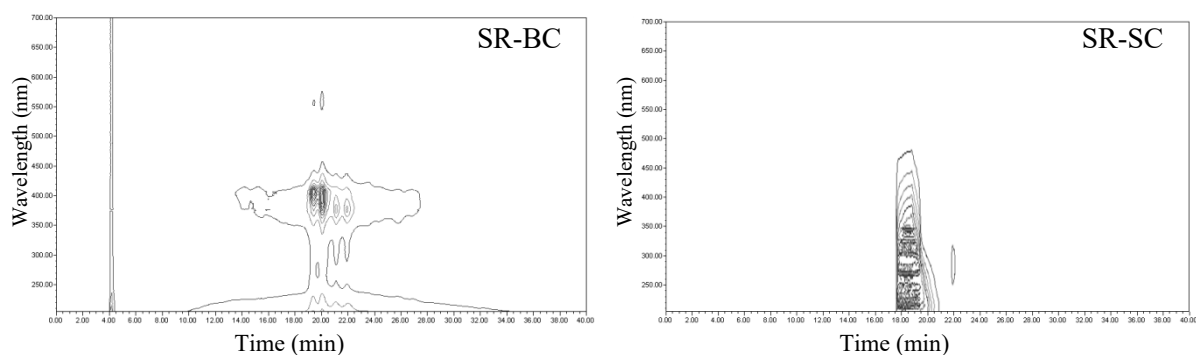

Figure S19. High-performance liquid 3D chromatograms of organic extracts of sediments of SR-BC and SR-SC obtained using HPLC-PAD

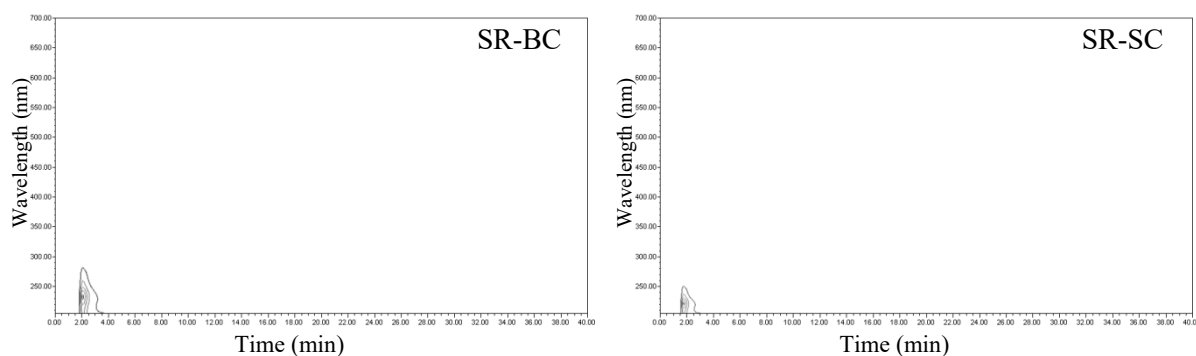

Figure S20. High-performance liquid 3D chromatograms of organic extracts of supernatants of SR-BC and SR-SC obtained using HPLC-PAD

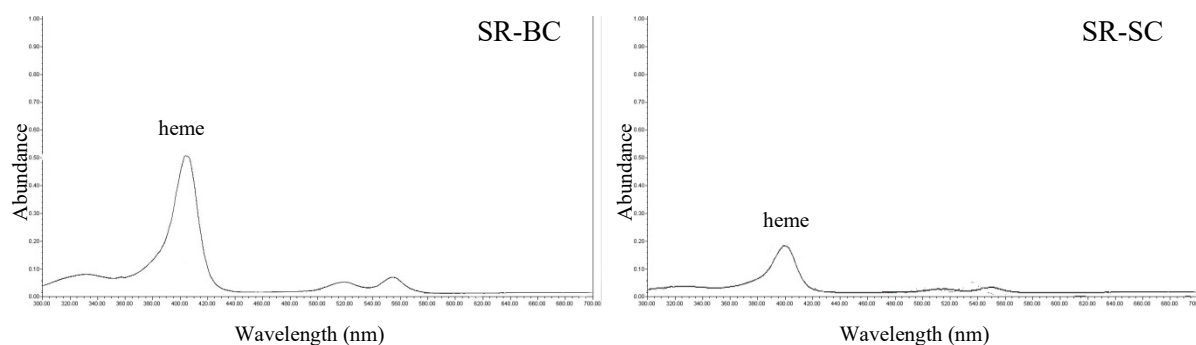

Figure S21. UV-Vis spectra of organic extracts of sediments of SR-BC and SR-SC obtained using HPLC-PAD



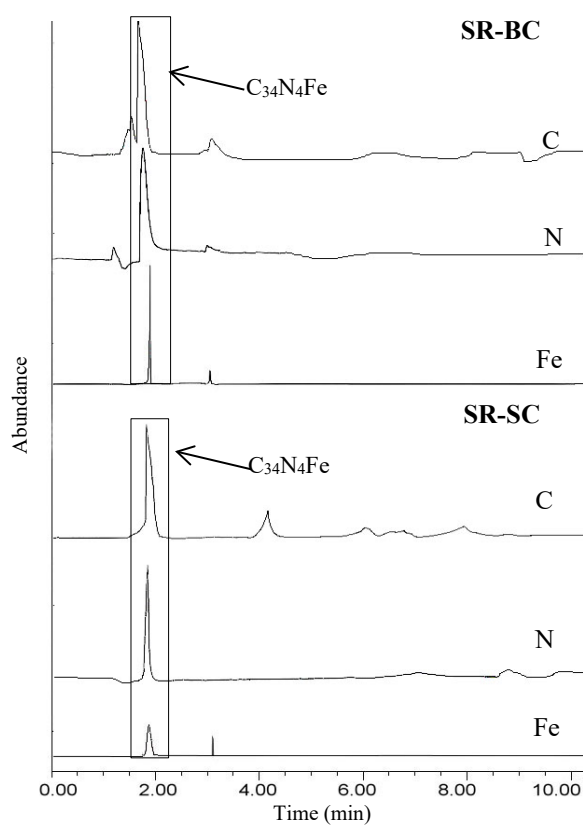

Figure S22. Detection of heme (carbon, nitrogen, and iron) in SR-BC and SR-SC—GC-AED chromatograms. AED chromatogram of heme is presented in Figure S5 (Supplementary information A)
