# Supplementary material for: Sedimentary Cobalt Protoporphyrin as a Potential Precursor of Prosthetic Heme Group for Bacteria Inhabiting Fossil Organic Matter-Rich Shale Rock
Source: MDPI journal article supplement (doi:10.3390/biom11121913), 2021-12-20
Supplement: s1 [file s1]

**Supplementary information B. Supplementary results of the chemical analyses of the BISR and SR samples**

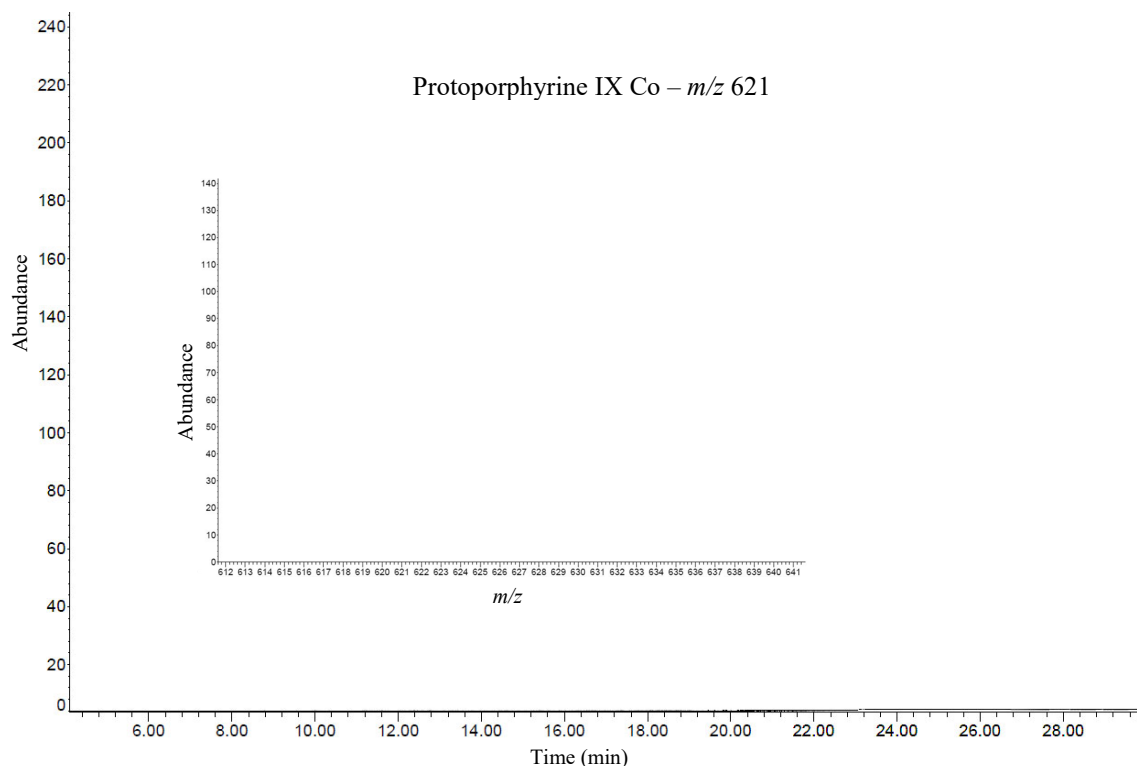

Figure S7. SIM chromatogram and mass spectrum (inset) of dichloromethane:methanol extract of BISR. SIM chromatogram of CoPPIX is presented in Figure S1 (Supplementary information A).

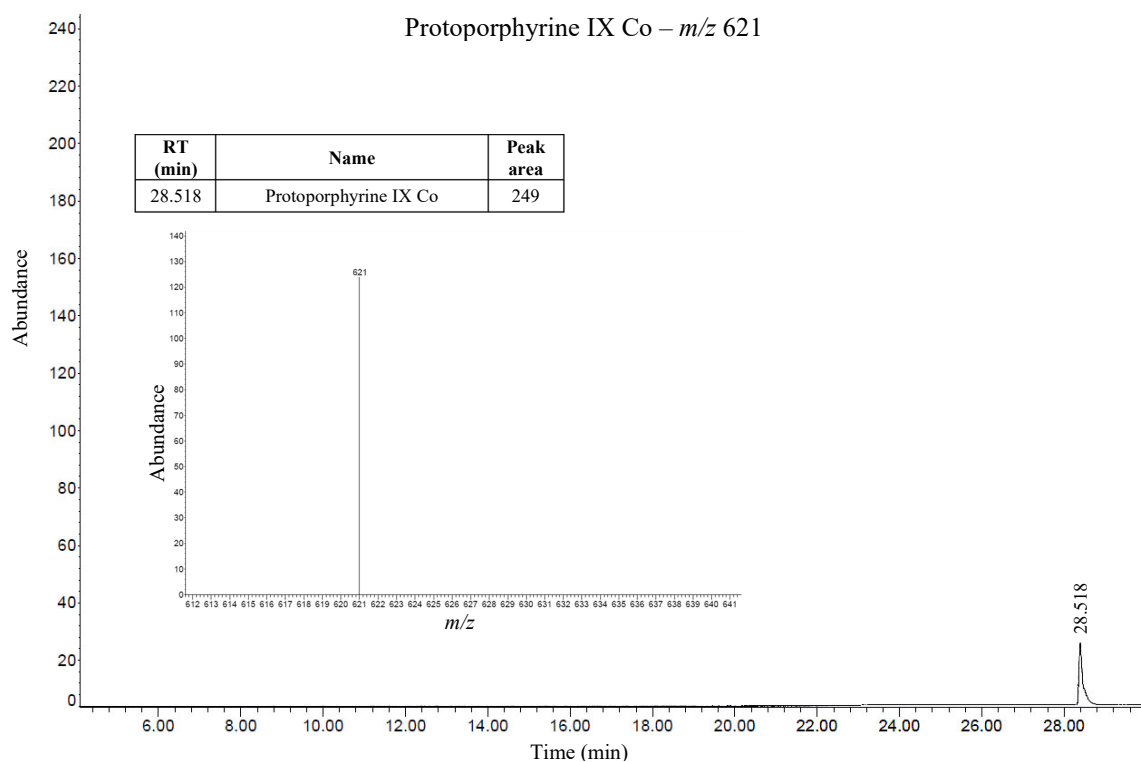

Figure S8. SIM chromatogram and mass spectrum (inset) of dichloromethane:methanol extract of SR. SIM chromatogram of CoPPIX is presented in Figure S1 (Supplementary information A).

Table S1. Concentrations of CoPPIX in BISR and SR based on GC-MS analyzes of  $m/z$  621

| Sample | Sample |       |       | SD    | Average | Unit    |
|--------|--------|-------|-------|-------|---------|---------|
|        | 1      | 2     | 3     |       |         |         |
| BISR   | 0      | 0     | 0     | 0     | 0       | μmol/kg |
| SR     | 0.824  | 0.822 | 0.805 | 0.010 | 0.817   | μmol/kg |

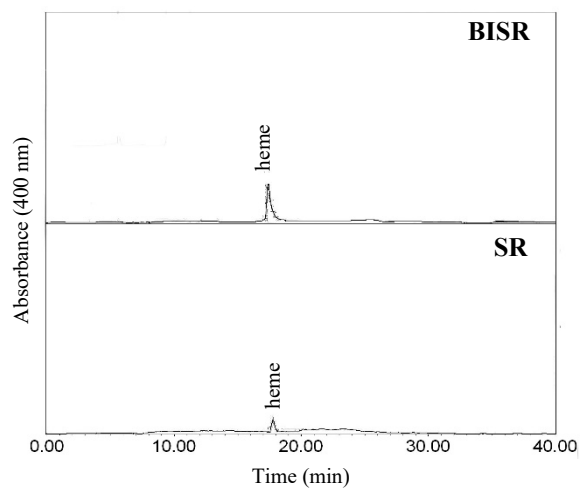

Figure S9. Detection of heme in BISR and SR samples—HPLC-PAD chromatograms at 400 nm. HPLC-PAD chromatogram of heme is presented in Figure S3A (Supplementary information A).

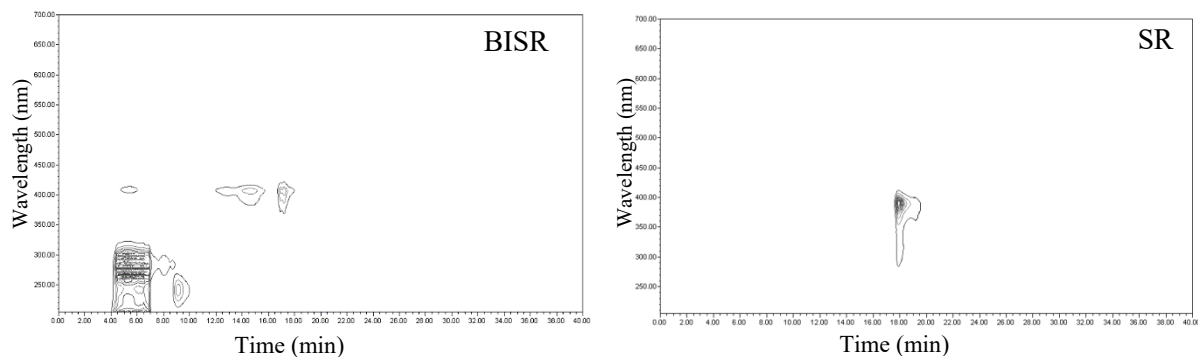

Figure S10. High-performance liquid 3D chromatograms of organic extracts of sediments of BISR and SR obtained using HPLC-PAD

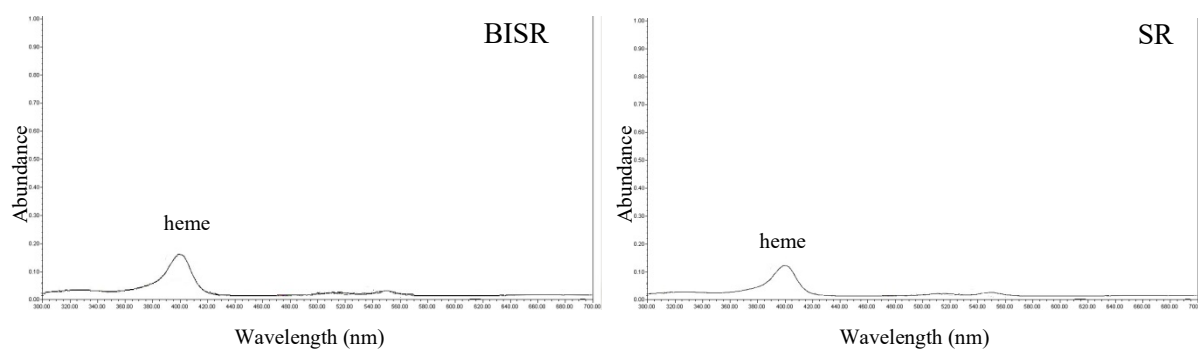

Figure S11. UV-Vis spectra of organic extracts of sediments of BISR and SR obtained using HPLC-PAD

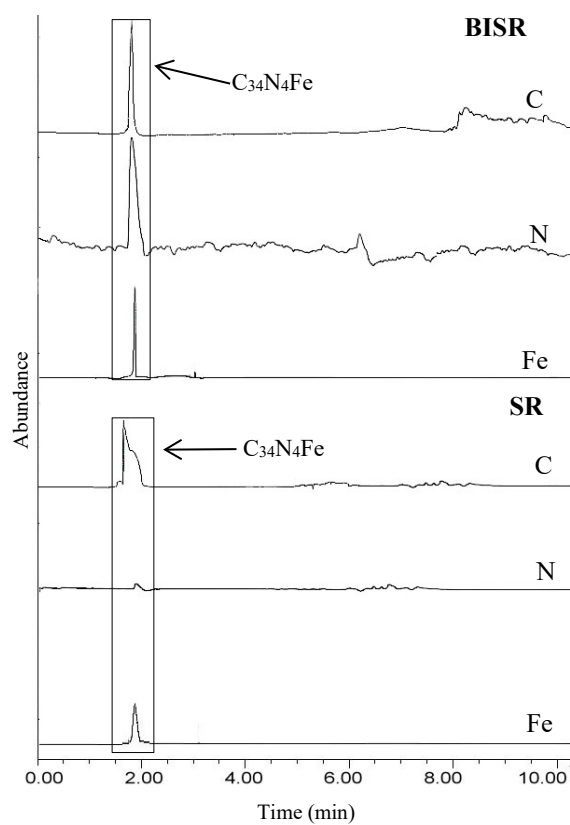

Figure S12. Detection of heme (carbon, nitrogen, and iron) in BISR and SR—GC-AED chromatograms. AED chromatogram of heme is presented in Figure S5 (Supplementary information A).
