# Supplementary material for: Sedimentary Cobalt Protoporphyrin as a Potential Precursor of Prosthetic Heme Group for Bacteria Inhabiting Fossil Organic Matter-Rich Shale Rock
Source: MDPI journal article supplement (doi:10.3390/biom11121913), 2021-12-20
Supplement: s1 [file s1]

## Supplementary information A. Analyses of standards and calibration curves

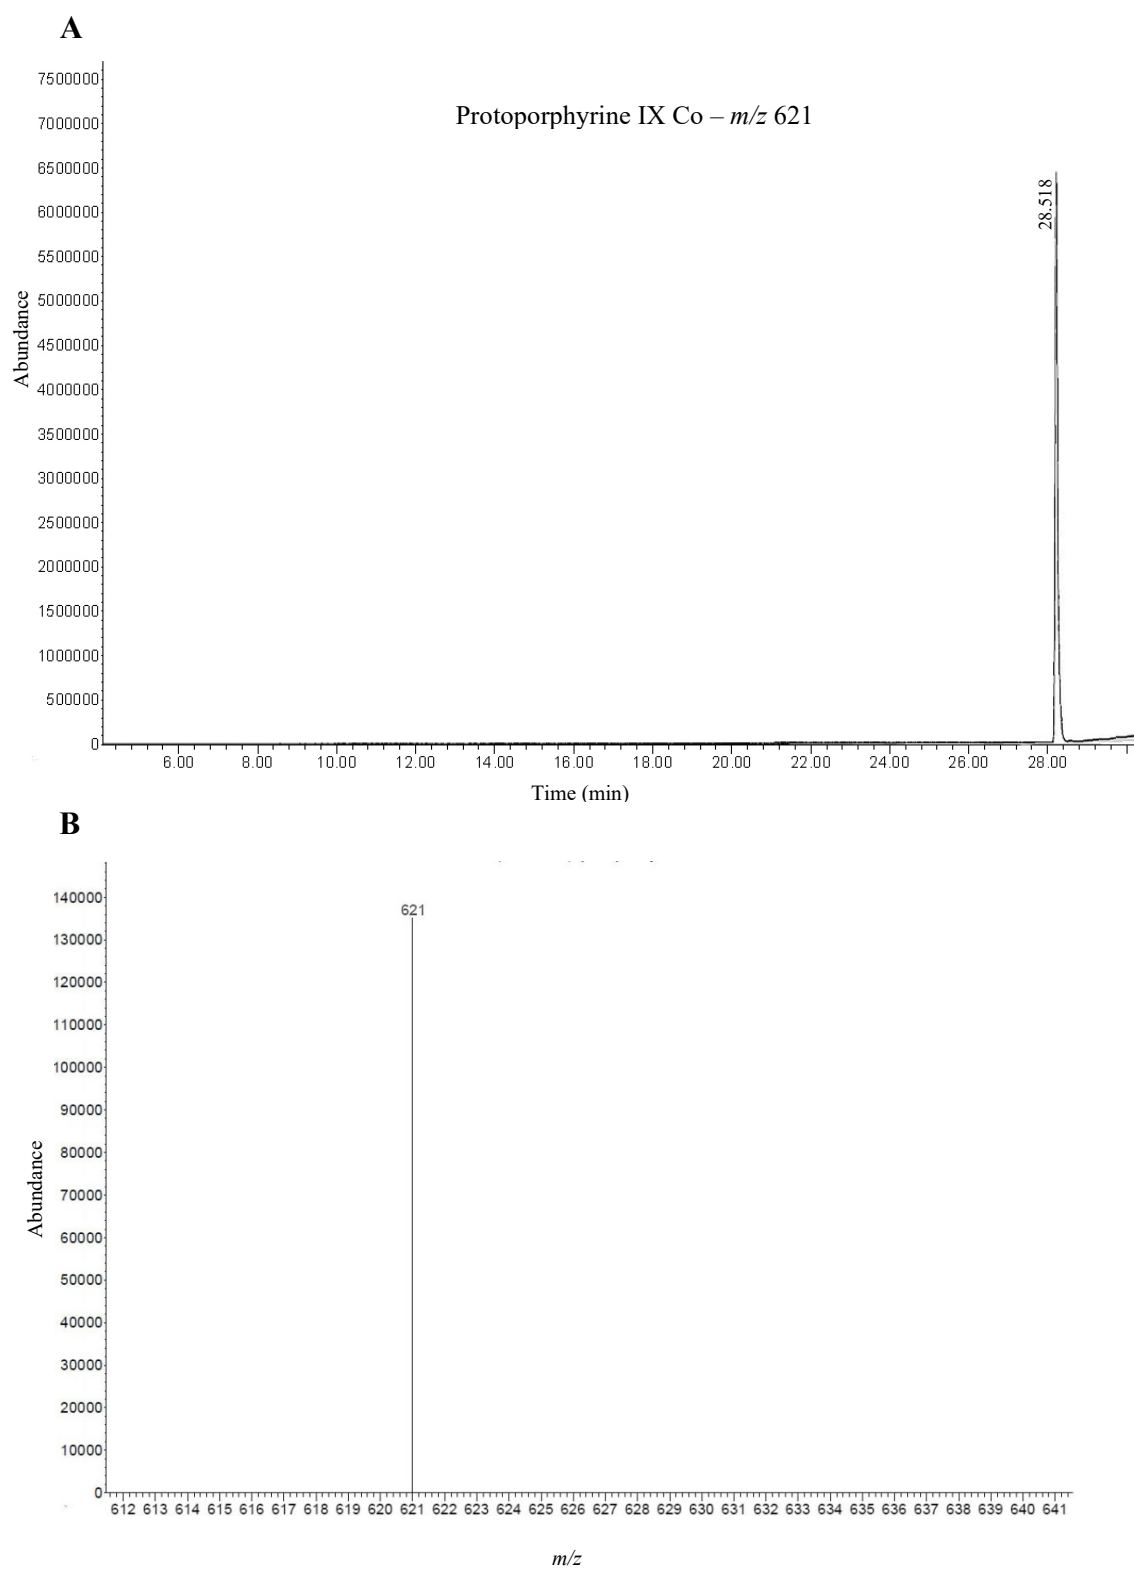

Figure S1. SIM chromatogram  $m/z$  621 (A) and mass spectrum of standard CoPPIX (16.1  $\mu$ M (10 mg/l)) (B)

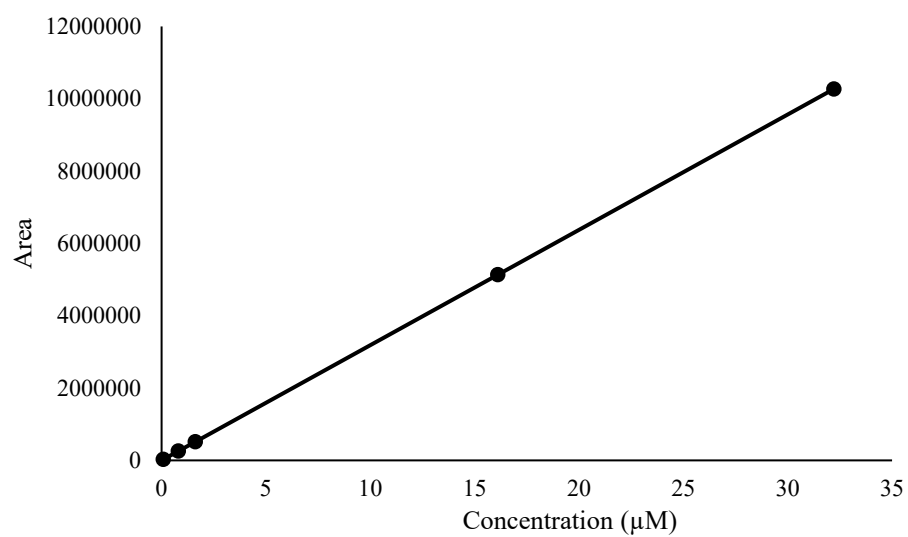

Figure S2. Calibration curve for determining the concentration of CoPPIX using GC–MS; coefficients of determination:  $R=0.996067$  and  $R^2=0.992456$

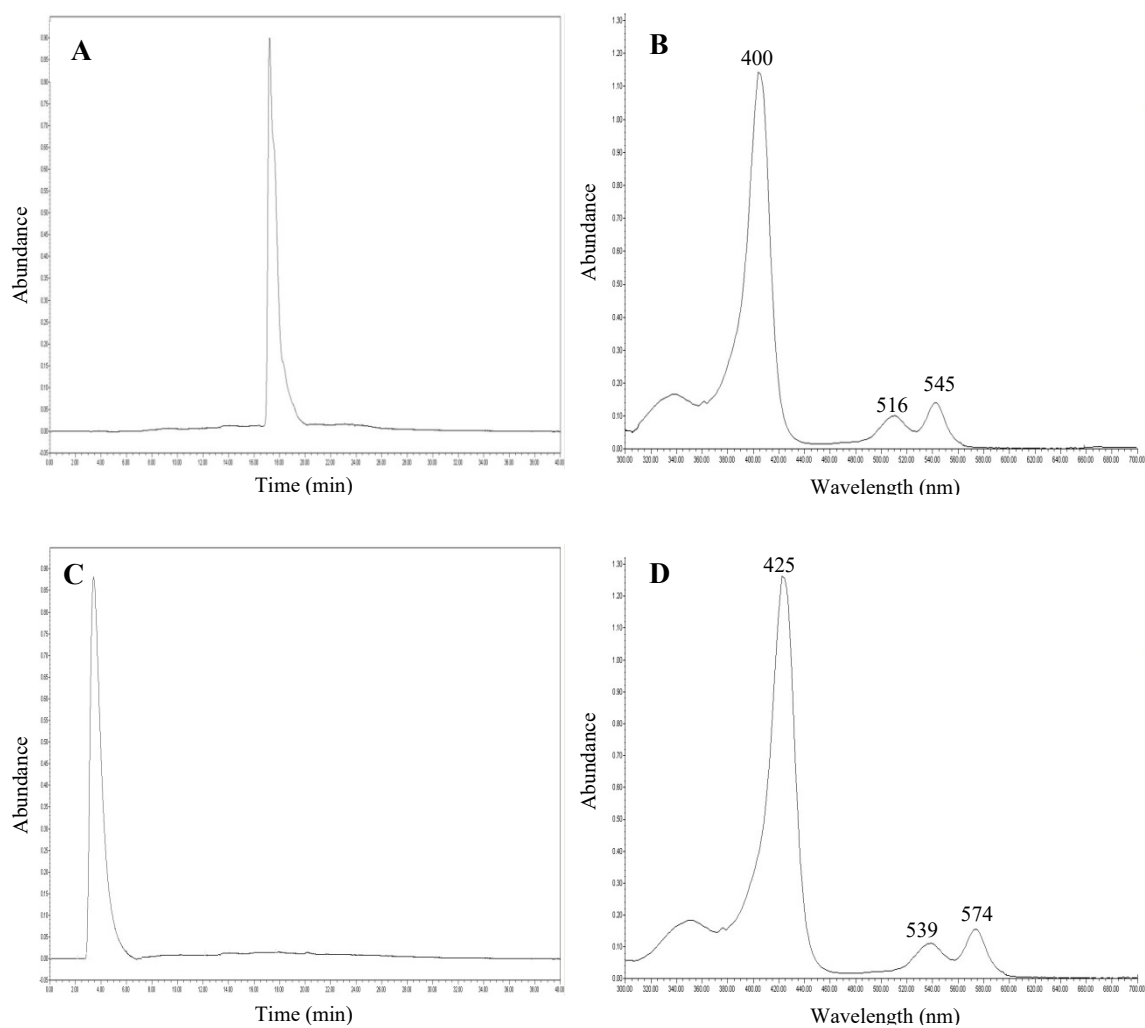

Figure S3. High-performance liquid chromatograms and UV–Vis spectra of standards (40.5  $\mu\text{M}$  (25 mg/l))—heme (400 nm) (A, B) and (40.25  $\mu\text{M}$  (25 mg/l)) CoPPIX (425 nm) (C, D)—obtained using HPLC-PAD

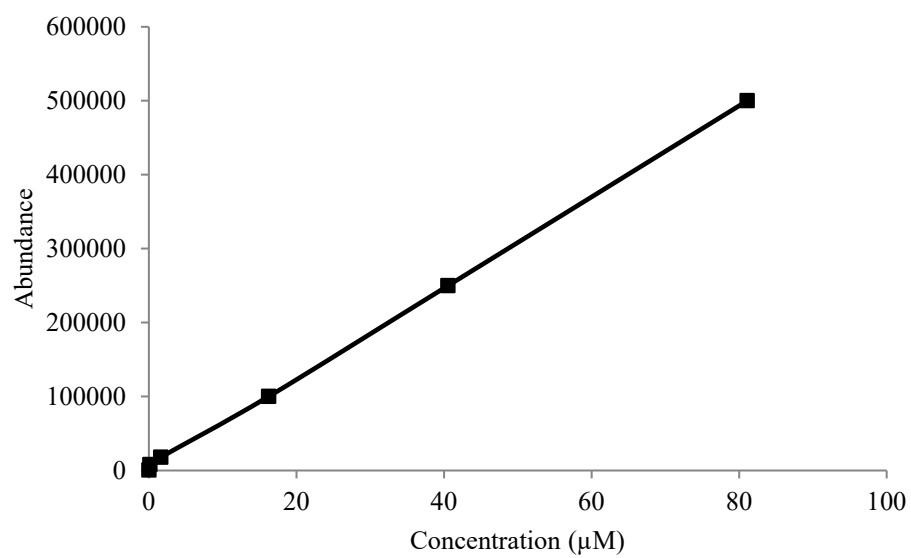

Figure S4. Calibration curve for determining the concentration of heme (400 nm) using HPLC-PAD; coefficients of determination:  $R=0.994382$  and  $R^2=0.993658$

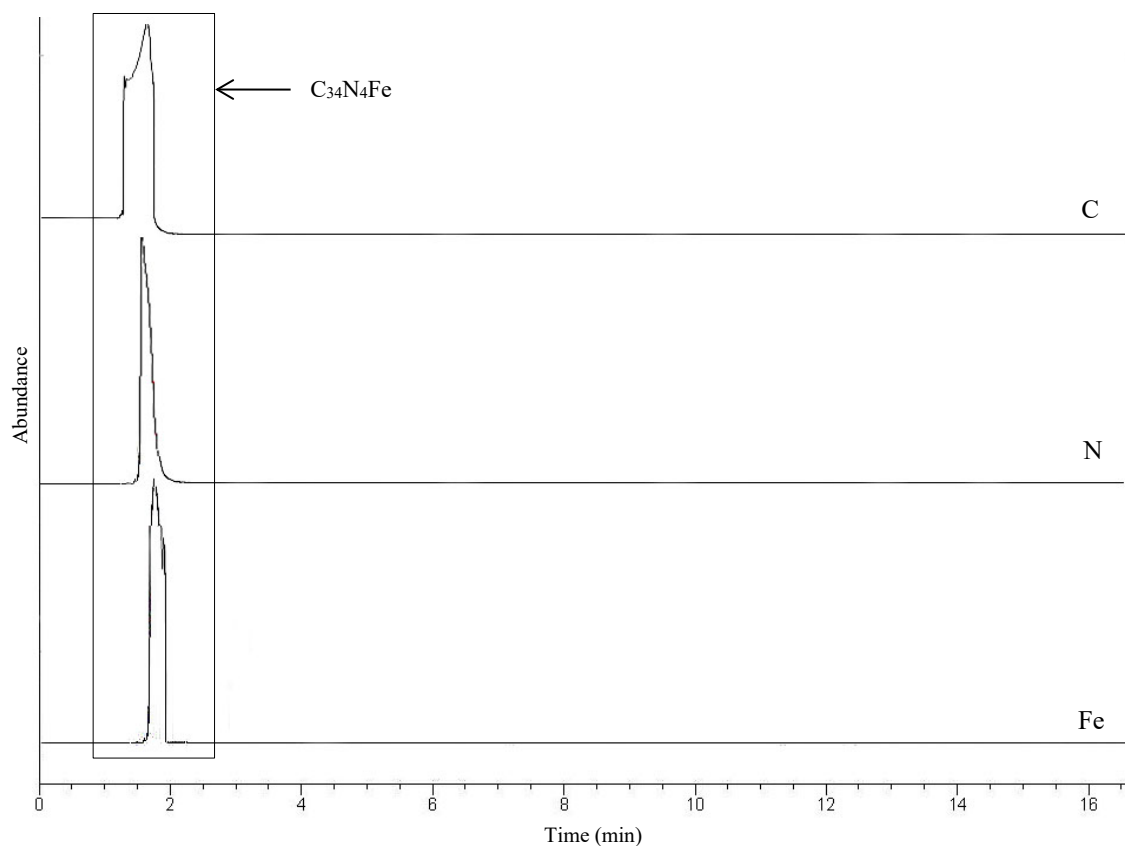

Figure S5. Atomic emission chromatogram of heme (1.62 μM (1 mg/l)) (lines of iron, carbon, and nitrogen were selected) (GC-AED)

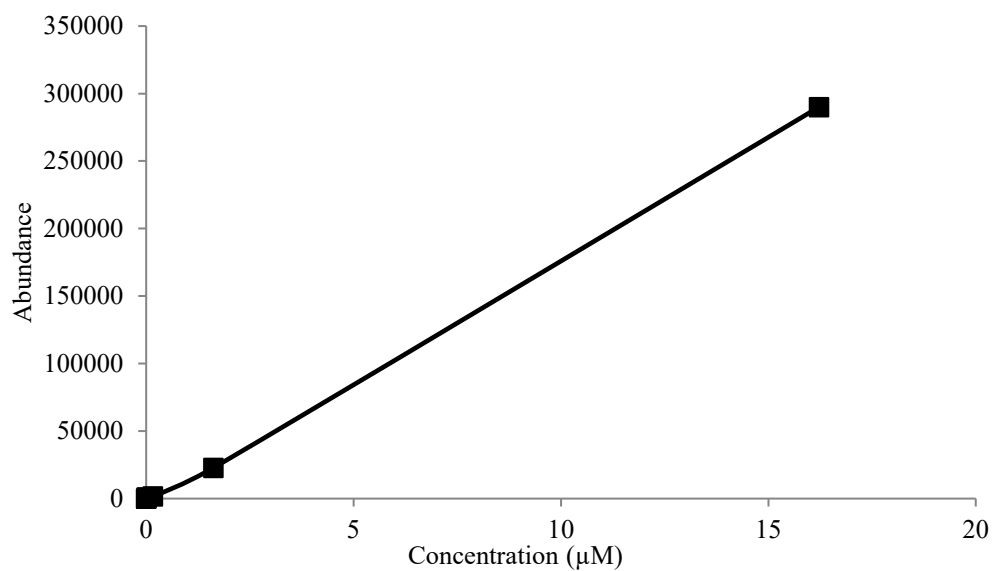

Figure S6. Calibration curve for determining the concentration of heme iron using GC-AED; coefficients of determination:  $R=0.992458$  and  $R^2=0.996365$
