# Supplementary material for: Sedimentary Cobalt Protoporphyrin as a Potential Precursor of Prosthetic Heme Group for Bacteria Inhabiting Fossil Organic Matter-Rich Shale Rock
Source: MDPI journal article supplement (doi:10.3390/biom11121913), 2021-12-20
Supplement: s1 [file s1]

## Supplementary information E. Supplementary results of metaproteome (BISR) and proteomes (SR-BC, CoPPIX-BC) analyses

Table S4. Numbers of sequences of enzymes involved in heme biosynthesis and uptake and cobalt insertion/disconnection detected in the metaproteome (BISR) and proteomes (SR-BC, CoPPIX-BC); EC – enzyme catalogue

| Enzyme                                           | Meta/proteome                                                                                                                               |                                                                                                                                                                                                                                                                                                                                                                                                                                                                                                                                                                                                                                                                                                                                                                                                                                                                                                                                                                                                                                                                     |                                                                                                                                                                                                           |
|--------------------------------------------------|---------------------------------------------------------------------------------------------------------------------------------------------|---------------------------------------------------------------------------------------------------------------------------------------------------------------------------------------------------------------------------------------------------------------------------------------------------------------------------------------------------------------------------------------------------------------------------------------------------------------------------------------------------------------------------------------------------------------------------------------------------------------------------------------------------------------------------------------------------------------------------------------------------------------------------------------------------------------------------------------------------------------------------------------------------------------------------------------------------------------------------------------------------------------------------------------------------------------------|-----------------------------------------------------------------------------------------------------------------------------------------------------------------------------------------------------------|
|                                                  | BISR                                                                                                                                        | SR-BC                                                                                                                                                                                                                                                                                                                                                                                                                                                                                                                                                                                                                                                                                                                                                                                                                                                                                                                                                                                                                                                               | PPIXCo-BC                                                                                                                                                                                                 |
| <b>Heme biosynthesis</b>                         |                                                                                                                                             |                                                                                                                                                                                                                                                                                                                                                                                                                                                                                                                                                                                                                                                                                                                                                                                                                                                                                                                                                                                                                                                                     |                                                                                                                                                                                                           |
| 5-aminolevulinate synthase<br>EC: 2.3.1.37       | -                                                                                                                                           | -                                                                                                                                                                                                                                                                                                                                                                                                                                                                                                                                                                                                                                                                                                                                                                                                                                                                                                                                                                                                                                                                   | -                                                                                                                                                                                                         |
| prophobilinogen synthase<br>EC: 4.2.1.24         | gi491027513, WP_004889204.1,<br>CAA35467.1, WP_004889204.1,<br>WP_002458905.1                                                               | WP_171700908.1, NNU91633.1, WP_012574296.1,<br>WP_077427980.1, WP_164970121.1, QAV27410.1,<br>WP_064220470.1, WP_192953941.1, WP_091704482.1,<br>WP_162829819.1, GAC90775.1, WP_043967315.1,<br>MBA2878521.1, WP_181520405.1, WP_171334820.1,<br>WP_183241280.1, WP_183249665.1, WP_081977254.1,<br>KIQ93786.1, KFZ41698.1, WP_099668858.1,<br>WP_141653475.1, WP_143255537.1, CUA78709.1,<br>OSX54462.1, WP_003396409.1, WP_163150307.1,<br>EPZ39665.1, EMI10609.1, WP_026011514.1<br>WP_035065471.1, WP_132947612.1, WP_183253443.1,<br>WP_111644614.1, WP_044894615.1, WP_181537467.1,<br>WP_066326516.1, WP_183183572.1, WP_027409488.1,<br>WP_044742938.1, WP_080862119.1, WP_090947548.1,<br>WP_159720222.1, WP_181554598.1, WP_043905655.1,<br>WP_064549662.1, WP_154709999.1, WP_098305099.1,<br>WP_035431564.1, WP_143415105.1, WP_015864684.1,<br>WP_090918682.1, WP_012095637.1, WP_017435491.1,<br>WP_097354818.1, WP_098914060.1, WP_090996694.1,<br>WP_003248840.1, WP_042406500.1, WP_062753092.1,<br>WP_089097970.1, WP_129727881.1, WP_013400298.1 | GGE75935.1, WP_188389021.1,<br>WP_020059980.1, WP_149178124.1,<br>WP_174098839.1, WP_166910561.1,<br>WP_097849105.1, WP_016092374.1,<br>WP_098337914.1, WP_017150631.1,<br>WP_087985328.1, WP_006096072.1 |
| hydroxymethylbilane<br>synthase<br>EC: 2.5.1.61  | AAA67601.1, WP_006599024.1,<br>WP_011275555.1, EDN66896.1,<br>WP_007473976.1, gi493647429,<br>WP_006599024.1, SEA14390.1,<br>WP_038352255.1 | WP_013379107.1, WP_090410885.1, RRF93330.1,<br>WP_133964473.1                                                                                                                                                                                                                                                                                                                                                                                                                                                                                                                                                                                                                                                                                                                                                                                                                                                                                                                                                                                                       | WP_118518172.1, WP_096920133.1,<br>WP_074617978.1, WP_082669377.1,<br>WP_014357354.1, WP_186841531.1,<br>WP_070369550.1                                                                                   |
| uroporphyrinogen III<br>synthase<br>EC: 4.2.1.75 | -                                                                                                                                           | WP_104683532.1, WP_057456053.1, WP_122259343.1,<br>WP_005781282.1, WP_002551372.1, WP_135003685.1,<br>WP_122280121.1, WP_058974945.1                                                                                                                                                                                                                                                                                                                                                                                                                                                                                                                                                                                                                                                                                                                                                                                                                                                                                                                                | WP_058402446.1, WP_011167310.1,<br>WP_134941604.1, WP_057433961.1,<br>WP_044324127.1                                                                                                                      |

|                                                                     |                                                                                  |                                                                                                                      |                                                                                                                                                                                                                                                                                                    |
|---------------------------------------------------------------------|----------------------------------------------------------------------------------|----------------------------------------------------------------------------------------------------------------------|----------------------------------------------------------------------------------------------------------------------------------------------------------------------------------------------------------------------------------------------------------------------------------------------------|
| uroporphyrinogen decarboxylase<br>EC: 4.1.1.37                      | gi 652459094, WP_026853903.1,<br>WP_002472704.1, WP_011275429.1                  | EFQ0483577.1, WP_024233173.1, WP_158120995.1                                                                         | WP_046082250.1, WP_112044854.1,<br>EGE0862999.1, HAI6559394.1,<br>WP_032247939.1, WP_000137653.1,<br>EEQ3568864.1, EFG5749303.1,<br>WP_023308555.1, WP_130570441.1,<br>WP_000137634.1, WP_072665359.1                                                                                              |
| coproporphyrinogen III oxidase<br>EC: 1.3.3.3                       | OKQ85218.1                                                                       | -                                                                                                                    | KJJ14657.1,<br>OKR61434.1, OKQ85218.1,<br>SQK83851.1, CDH74354.1                                                                                                                                                                                                                                   |
| oxygen-independent coproporphyrinogen III oxidase<br>EC: 1.3.98.3   | gi659868130, WP_029915001.1,<br>gi684178909, gbEAQ38129.3                        | WP_119522890.1                                                                                                       | WP_113886989.1, WP_134302878.1,<br>WP_171889427.1, WP_070339703.1,<br>WP_023089009.1, WP_115759736.1,<br>WP_070338550.1, WP_023518539.1,<br>PXC07943.1, WP_160511252.1,<br>WP_124141246.1, WP_181261645.1,<br>WP_116830028.1, WP_126862502.1,<br>WP_134310010.1, WP_089034942.1,<br>WP_128538975.1 |
| protoporphyrin/ coproporphyrin III oxidase<br>EC: 1.3.3.4           | -                                                                                | -                                                                                                                    | -                                                                                                                                                                                                                                                                                                  |
| menaquinone-dependent protoporphyrinogen III oxidase<br>EC: 1.3.5.3 | -                                                                                | -                                                                                                                    | -                                                                                                                                                                                                                                                                                                  |
| protoporphyrinogen IX oxidase<br>EC: 1.3.99                         | -                                                                                | -                                                                                                                    | -                                                                                                                                                                                                                                                                                                  |
| protoporphyrin/coproporphyrin ferrochelatase<br>EC: 4.99.1.1        | WP_011275430.1, WP_027696985.1,<br>WP_003099324.1, WP_021264089.1,<br>AAT51432.1 | WP_121784350.1, WP_031686597.1, WP_136310185.1,<br>WP_174218239.1, WP_058202634.1, WP_094776821.1,<br>WP_132457701.1 | WP_126475982.1, WP_160518319.1,<br>WP_033877308.1, WP_094776821.1,<br>WP_132457701.1, WP_121784350.1,<br>WP_031686597.1                                                                                                                                                                            |
| <b>Heme uptake</b>                                                  |                                                                                  |                                                                                                                      |                                                                                                                                                                                                                                                                                                    |
| heme acquisition protein HasA                                       | -                                                                                | -                                                                                                                    | -                                                                                                                                                                                                                                                                                                  |
| periplasmic protein TonB                                            | WP_197862675.1                                                                   | WP_138407792, WP_138411937.1, WP_148924790.1,<br>WP_181112699.1, WP_152489604.1, WP_102834729.1,<br>WP_138486174.1   | WP_148924790.1, WP_181112699.1,<br>WP_152489604.1, WP_102834729.1                                                                                                                                                                                                                                  |

|                                                                              |                                                                                                                                                |                                                                                                                                                                                                                                                                                                                                                                                                |                                                                                                                                                                                                                                                                                                                                                                                                                                                                                                  |
|------------------------------------------------------------------------------|------------------------------------------------------------------------------------------------------------------------------------------------|------------------------------------------------------------------------------------------------------------------------------------------------------------------------------------------------------------------------------------------------------------------------------------------------------------------------------------------------------------------------------------------------|--------------------------------------------------------------------------------------------------------------------------------------------------------------------------------------------------------------------------------------------------------------------------------------------------------------------------------------------------------------------------------------------------------------------------------------------------------------------------------------------------|
| hemoglobin/transferrin/lactoferrin receptor protein (hemr)                   | WP_058169809.1, WP_182150463.1, WP_128672018.1, WP_003095535.1, WP_022580007.1                                                                 | WP_128672018.1, WP_003095535.1, WP_022580007.1, WP_058159931.1, WP_033990026.1, WP_132444818.1, WP_003135463.1, WP_134572733.1, WP_134633887.1, WP_009314330.1, WP_033954696.1, WP_058150557.1, WP_034021499.1, WP_132868020.1, WP_116820038.1, WP_033963567.1, WP_024947020.1, WP_121382417.1, WP_034036579.1, WP_132497680.1, WP_126896166.1, WP_124988305.1, WP_126861255.1, WP_096069494.1 | WP_058169809.1, WP_182150463.1, WP_124133528.1, WP_125909932.1, WP_033990026.1, WP_132444818.1, WP_003135463.1                                                                                                                                                                                                                                                                                                                                                                                   |
| biopolymer transport protein ExbB                                            | WP_164634537.1                                                                                                                                 | WP_197962956.1, WP_152102413.1, TAI63057.1, WP_158669561.1, WP_028140254.1, WP_194471296.1, WP_027278412.1, WP_066509674.1, OCX26818.1, WP_094194199.1, WP_035998843.1, OIM94023.1, WP_100952068.1, WP_152977387.1                                                                                                                                                                             | WP_022724321.1, WP_107346470.1, WP_107357418.1, WP_142882041.1, WP_041798587.1, ABE41223.1, WP_182746610.1, WP_092686109.1, MBI5130876.1, WP_054162619.1, WP_114357654.1, OPF91494.1, WP_110788226.1, WP_119855070.1, NVN85044.1, WP_089025497.1, WP_139486359.1, VIO80036.1, WP_139864777.1, WP_106326951.1, WP_194471296.1, WP_027278412.1, WP_066509674.1, OCX26818.1, WP_094194199.1, WP_035998843.1, OIM94023.1, WP_100952068.1, WP_152977387.1, WP_036041101.1, WP_095736165.1, RZN28968.1 |
| biopolymer transport protein ExbD                                            | WP_072840788.1                                                                                                                                 | WP_012071749.1, WP_111608707.1, WP_113918029.1, WP_112135015.1, WP_176336467.1, WP_111639718.1, WP_024025681.1, WP_123095856.1                                                                                                                                                                                                                                                                 | WP_113918029.1                                                                                                                                                                                                                                                                                                                                                                                                                                                                                   |
| <b>Cobalt insertion/disconnection</b>                                        |                                                                                                                                                |                                                                                                                                                                                                                                                                                                                                                                                                |                                                                                                                                                                                                                                                                                                                                                                                                                                                                                                  |
| sirohydrochlorin cobaltochelatase/sirohydrochlorin cobalt-lyase EC: 4.99.1.3 | WP_060613678.1, WP_100263700.1, WP_149632279.1, WP_042956680.1, WP_027912619.1, WP_028237679.1, WP_024616339.1, WP_092412700.1, WP_114731145.1 | WP_003199795.1, WP_053183376.1, WP_092462015.1, WP_039011076.1, WP_043041964.1, WP_186728245.1, WP_053120776.1                                                                                                                                                                                                                                                                                 | WP_092145369.1, WP_063322157.1, WP_043041964.1, WP_186728245.1, WP_092223853.1, WP_053178647.1                                                                                                                                                                                                                                                                                                                                                                                                   |

Table S5. Numbers of hemoprotein sequences detected in the metaproteome (BISR) and proteomes (SR-BC, CoPPIX-BC)

| Hemoprotein | Meta/proteome                                                                                                                                                                                                                                                                                                                                                                                                                                                                          |                                                                                                                                          |                                                                                                                                                                                                                                                                                                                                                                                                                                 |
|-------------|----------------------------------------------------------------------------------------------------------------------------------------------------------------------------------------------------------------------------------------------------------------------------------------------------------------------------------------------------------------------------------------------------------------------------------------------------------------------------------------|------------------------------------------------------------------------------------------------------------------------------------------|---------------------------------------------------------------------------------------------------------------------------------------------------------------------------------------------------------------------------------------------------------------------------------------------------------------------------------------------------------------------------------------------------------------------------------|
|             | BISR                                                                                                                                                                                                                                                                                                                                                                                                                                                                                   | SR-BC                                                                                                                                    | CoPPIX-BC                                                                                                                                                                                                                                                                                                                                                                                                                       |
| Cytochromes | gi 499245897, gi 493924522, gi 330949201, gi 268584477, gi 499630345, gi 498185039, gi 499630342, gi 517333069, gi 519012058, gi 488713780, gi 490102597, gi 671493207, gi 631847638, gi 497318490, gi 519020998, gi 353255924, gi 504263092, gi 124514988, gi 344169056, gi 503795255, gi 504774832, gi 503795252, gi 495086913, gi 124515016, gi 320462, gi 329112144, gi 499595441, gi 653251020, gi 499595357, gi 494666478, gi 410732281, gi 76667604, gi 543962213, gi 302039157 | gi 504667349, gi 489380605, gi 739667945, gi 648288579, EKG43499.1, gi 516498201, gi 392421384, gi 146284245, gi 489379413, gi 739176448 | gi 602235550, gi 950761959, gi 1027764433, gi 545655965, gi 951276957, gi 521092032, gi 737997068, Q8KS19, gi 489068679, gi 501226912, gi 653577710, gi 489376117, gi 489376656, gi 489380605, gi 739667945, gi 648288579, gi 516498201, gi 392421384, gi 146284245, P81154, Q52369, gi 674642377, C1DN39, Q9I3M9, gi 739176448, gi 26988052, gi 489379413, gi 498175705, gi 504667349, gi 492990377, gi 737247626, gi 21702709 |
| Catalases   | gi 494666045, KXK49644.1, gi 1698550, gi 504938131, gi 491324047, gi 3927890, gi 520401, gi 500251659, gi 504938131, gi 499595129                                                                                                                                                                                                                                                                                                                                                      | gi 500260364, PYN24457.1, KPX01798.1, gi 516497823, CJL05199.1                                                                           | gi 516497823, Q9I1W8, gi 500260364, A4VK13, B0TRN5                                                                                                                                                                                                                                                                                                                                                                              |
| Peroxidases | gi 489375670, gi 515815228, gi 488371807, gi 503795169, gi 498325609                                                                                                                                                                                                                                                                                                                                                                                                                   | gi 692344295, KFJ89559.1, gi 489377300                                                                                                   | gi 489378348, gi 692344295, gi 489377300, gi 514327837, gi 495264620                                                                                                                                                                                                                                                                                                                                                            |
